# Supplementary material
Source: PubMed Central journal article supplement (PMC2916021)

(A) Chemical structures of CDDO analogues

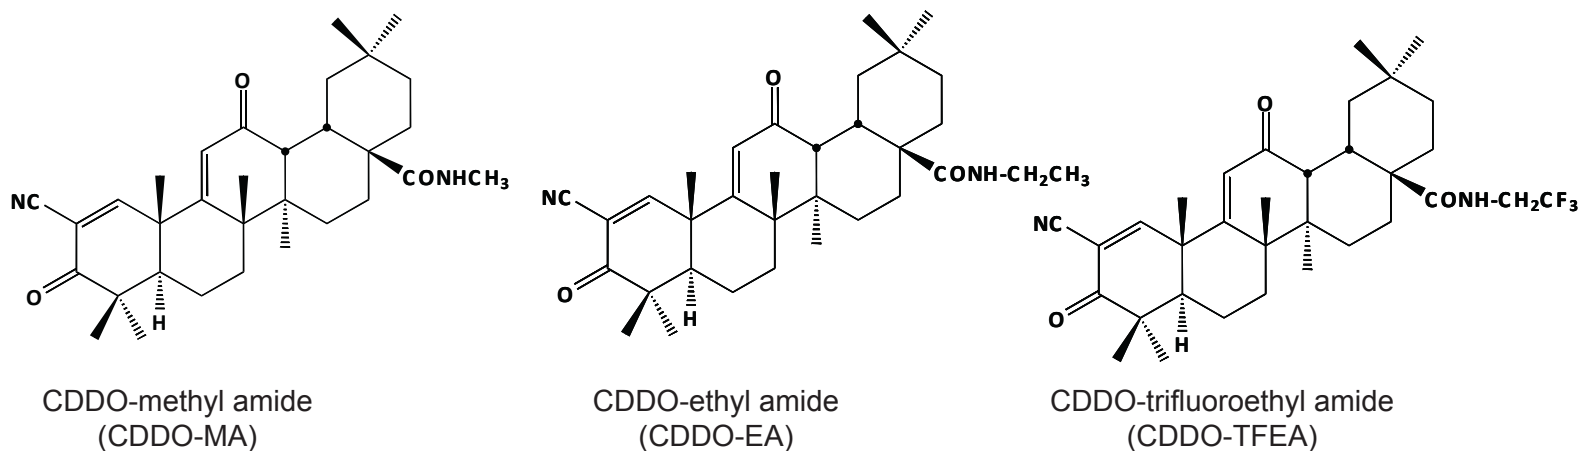

(B) Comparison of CDDO-MA versus CDDO-EA wildtype brain levels at 800mg/kg diet

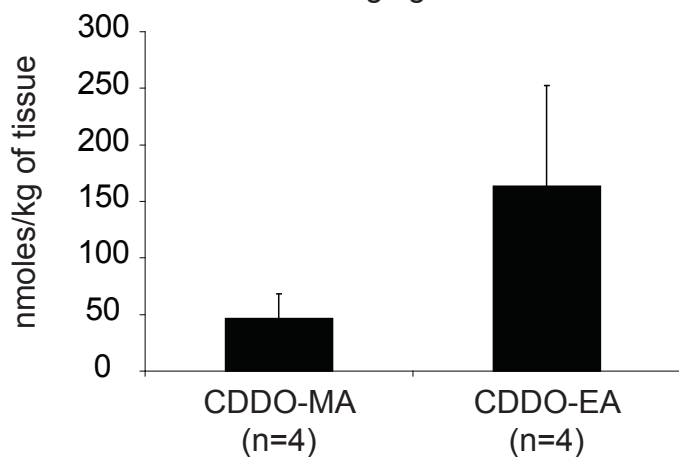

(C) Comparison of CDDO-EA versus CDDO-TFEA wildtype brain levels at 200 and 400mg/kg diet

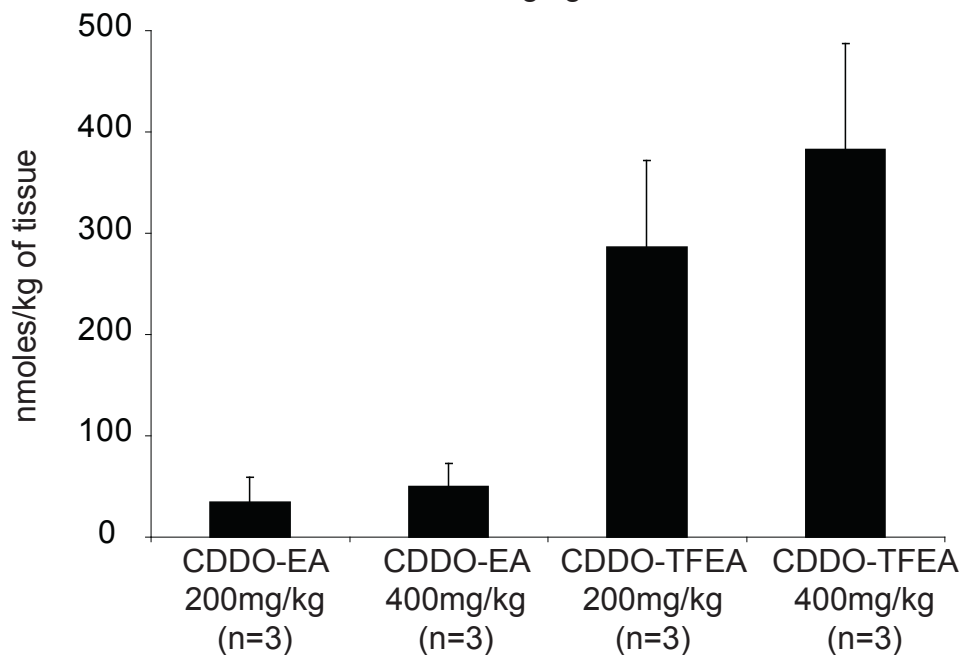

Supplement: NIHMS190980-supplement-01.pdf [file NIHMS190980-supplement-01.pdf]
