# Supplementary material
Source: PubMed Central journal article supplement (PMC2916021)

Stack et al.  
Supplementary Figure 2

(A) Concentration of spiked CDDO-EA

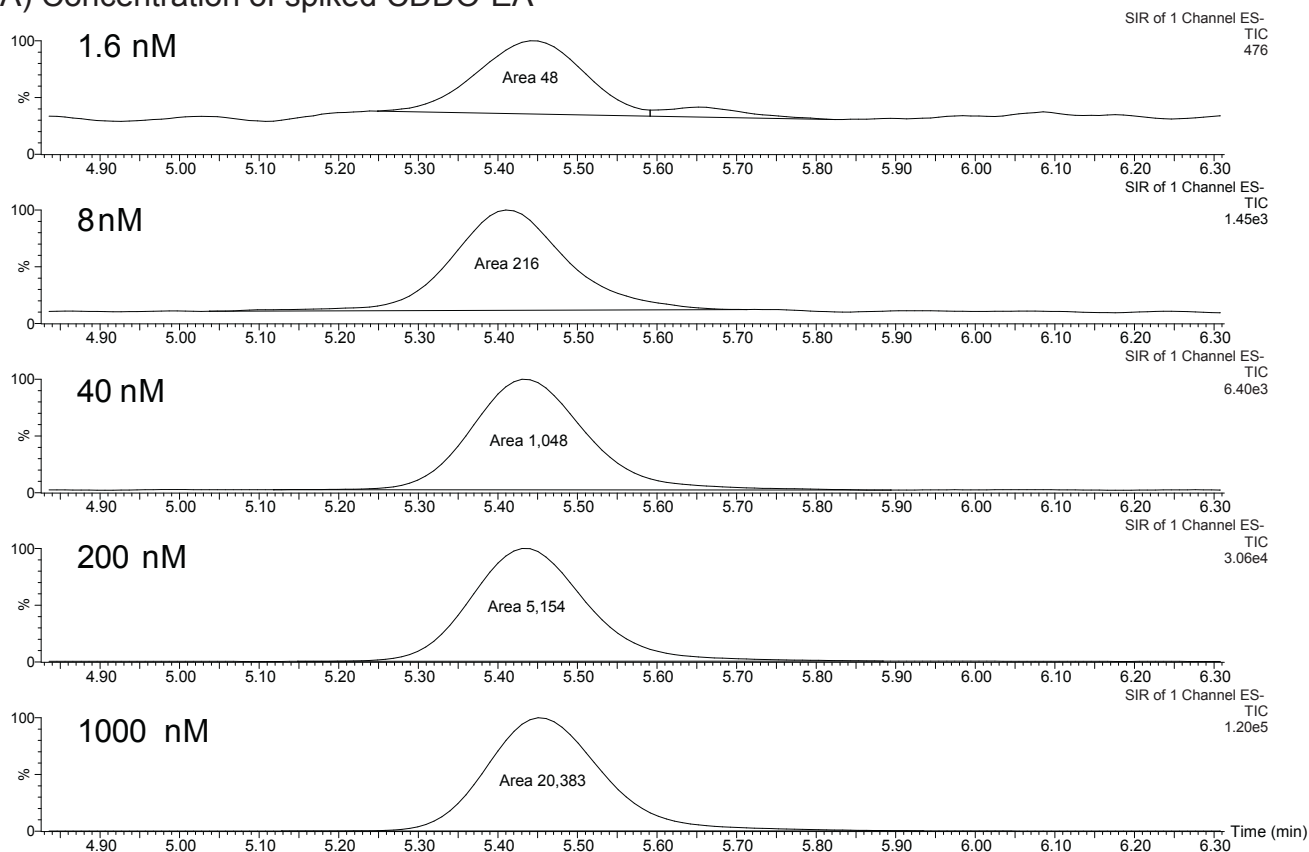

(B) Concentration of spiked CDDO-TFEA

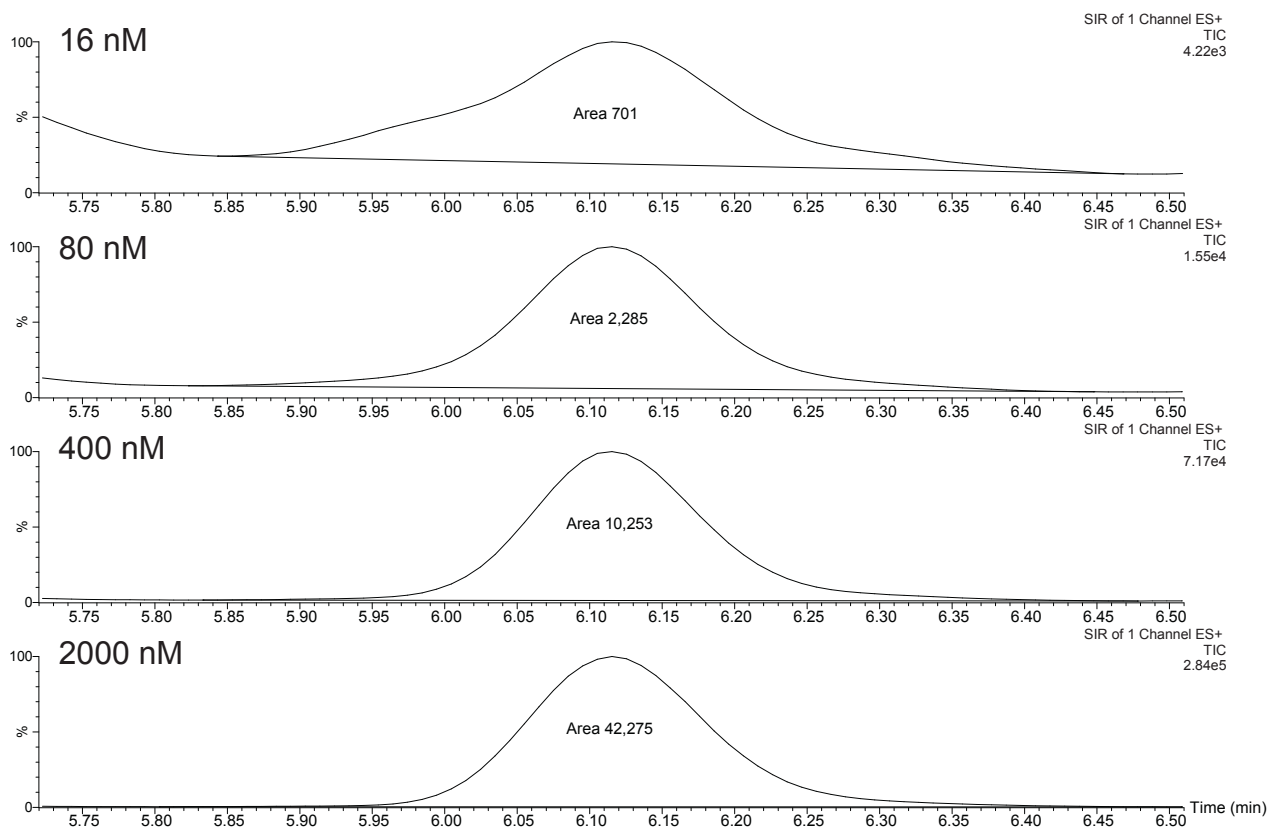

Supplement: NIHMS190980-supplement-02.pdf [file NIHMS190980-supplement-02.pdf]
