# Supplementary material
Source: PubMed Central journal article supplement (PMC2916021)

(A) Chromatograms of CDDO-EA 100mg/kg diet in N171-82Q skeletal muscle

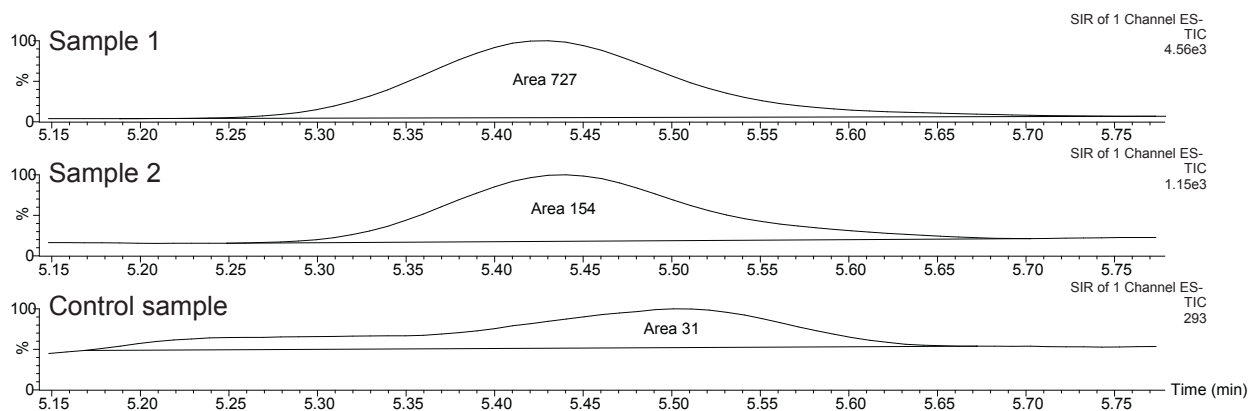

(B) Chromatograms of CDDO-EA 200mg/kg diet in N171-82Q skeletal muscle

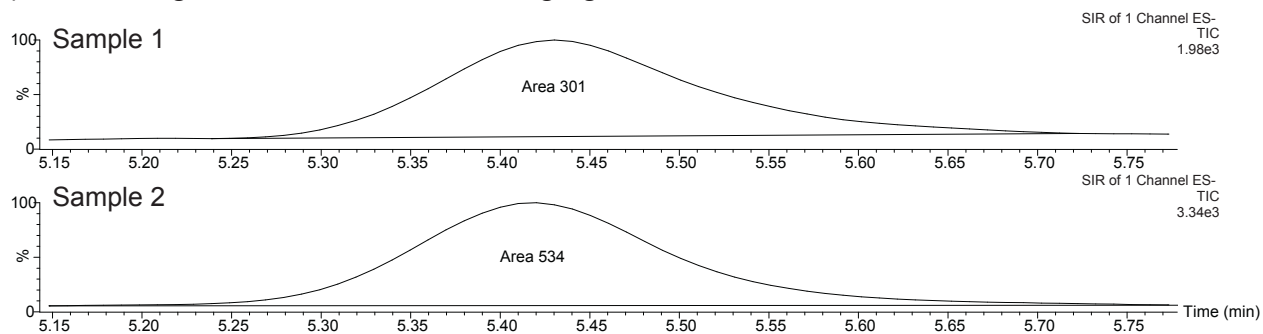

(C) CDDO-EA in N171-82Q skeletal muscle

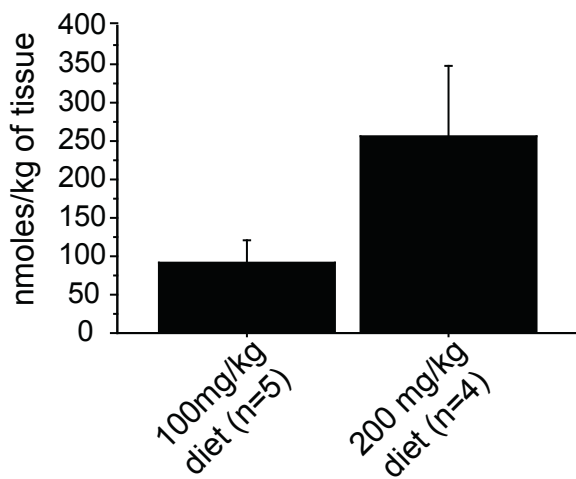

Supplement: NIHMS190980-supplement-04.pdf [file NIHMS190980-supplement-04.pdf]
