# Supplementary material
Source: PubMed Central journal article supplement (PMC2916021)

(A) Chromatograms of CDDO-TFEA 100mg/kg diet in N171-82Q cortex

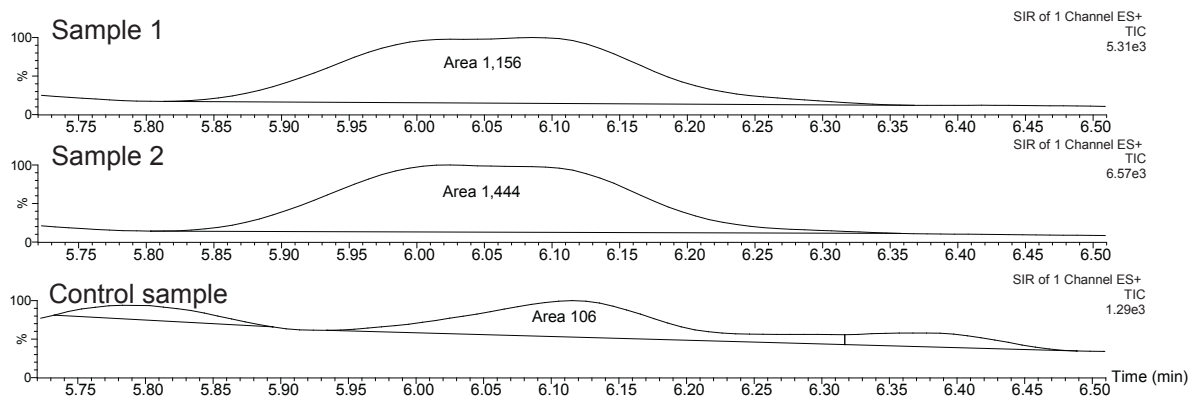

(B) Chromatograms of CDDO-TFEA 200mg/kg diet in N171-82Q cortex

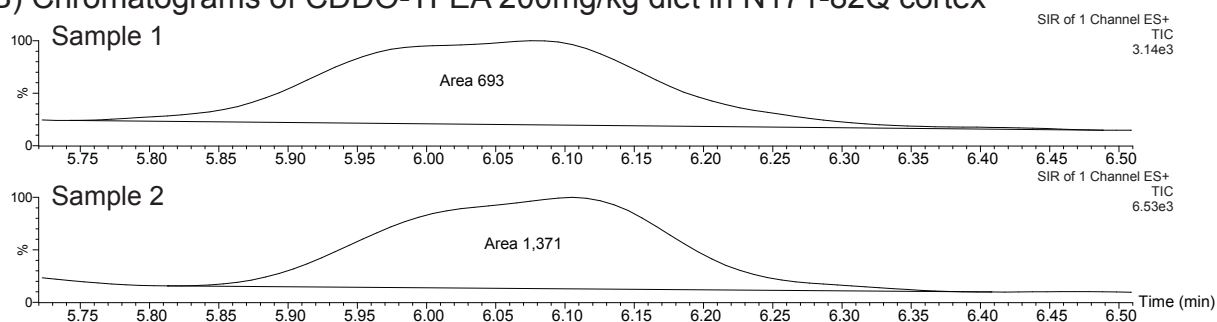

(C) Chromatograms of CDDO-TFEA 400mg/kg diet in N171-82Q cortex

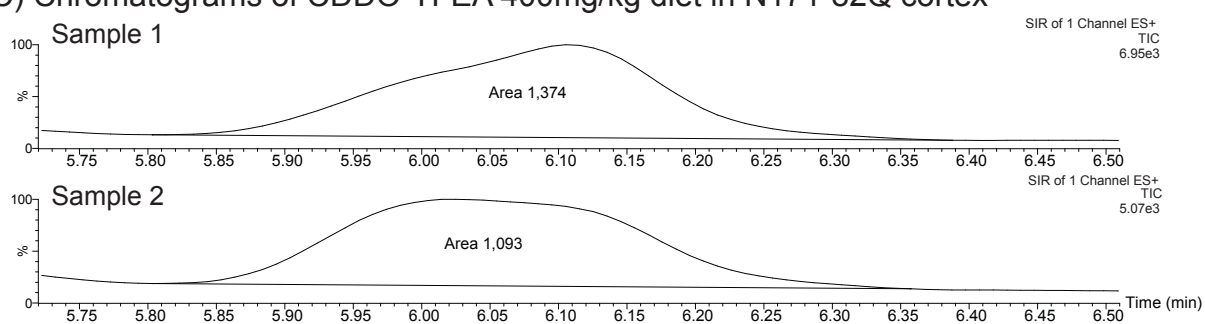

(D) CDDO-TFEA in N171-82Q cortex

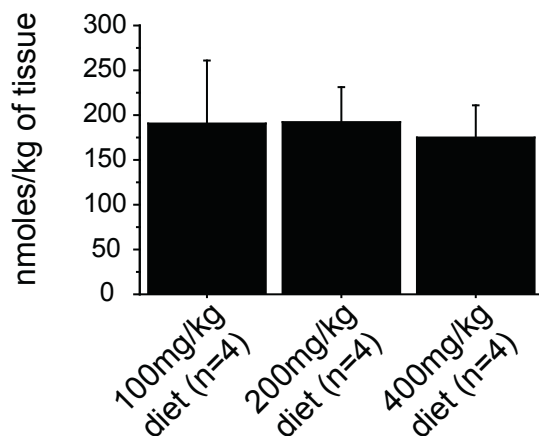

Supplement: NIHMS190980-supplement-05.pdf [file NIHMS190980-supplement-05.pdf]
