# Supplementary material
Source: PubMed Central journal article supplement (PMC2916021)

(A) Chromatograms of CDDO-TFEA 100mg/kg diet in N171-82Q skeletal muscle

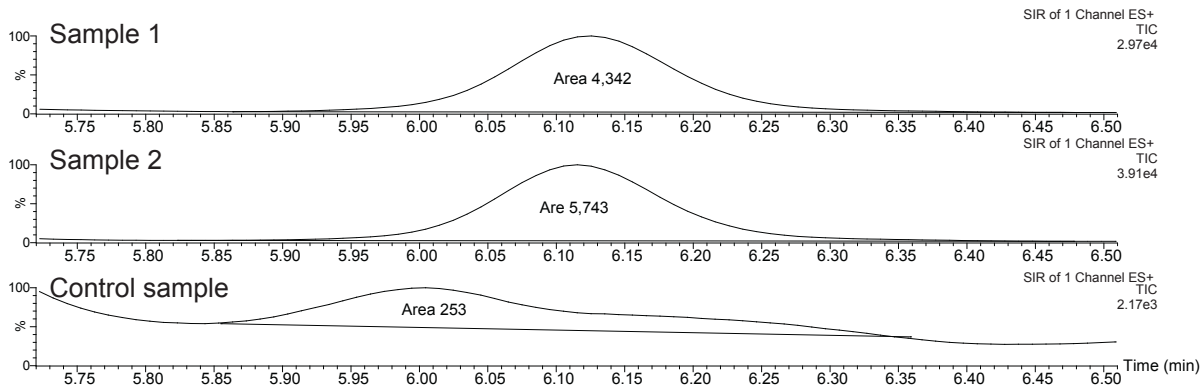

(B) Chromatograms of CDDO-TFEA 200mg/kg diet in N171-82Q skeletal muscle

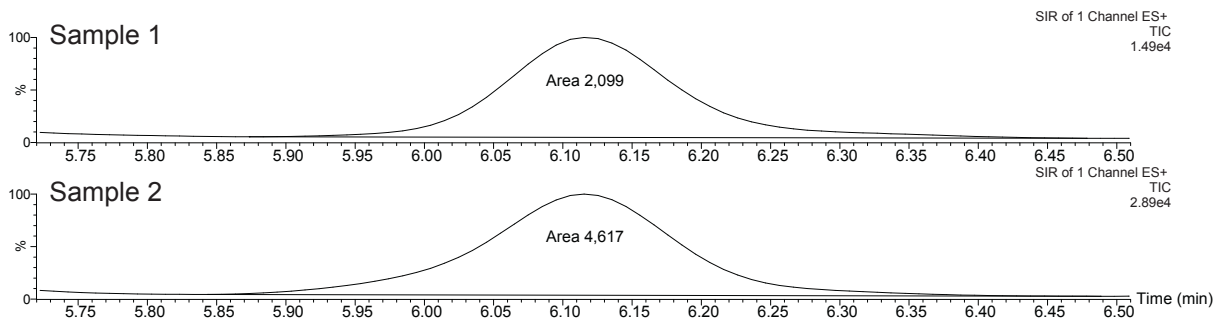

(C) Chromatograms of CDDO-TFEA 400mg/kg diet in N171-82Q skeletal muscle

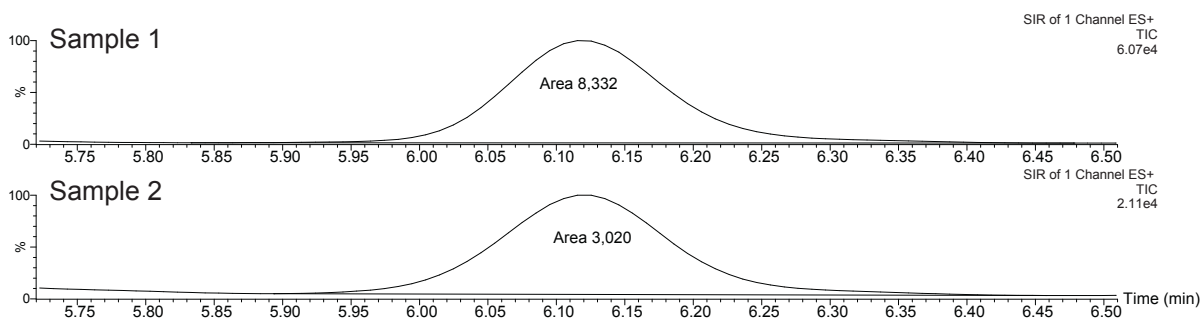

(D) CDDO-TFEA in N171-82Q skeletal muscle

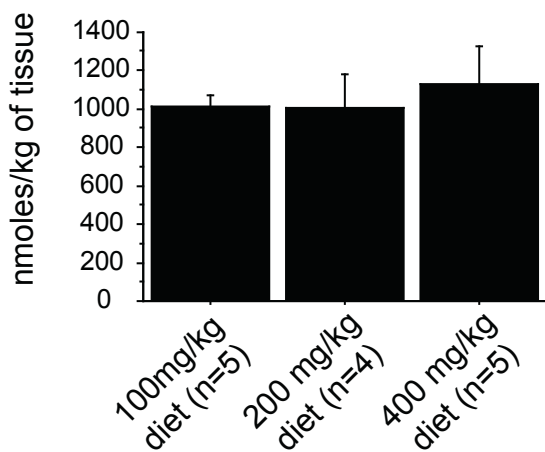

Supplement: NIHMS190980-supplement-06.pdf [file NIHMS190980-supplement-06.pdf]
