# Supplementary material
Source: PubMed Central journal article supplement (PMC2916021)

(A) Body weight of male N171-82Q mice treated with CDDO-EA diets

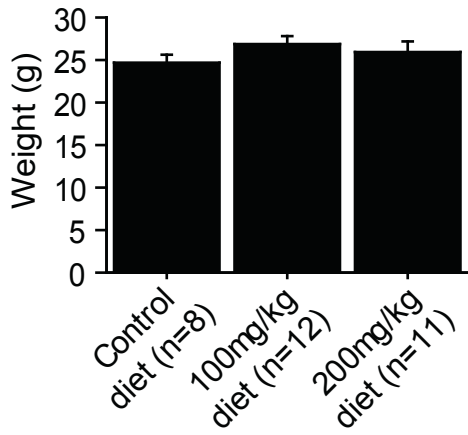

(B) Body weight of female N171-82Q mice treated with CDDO-EA diets

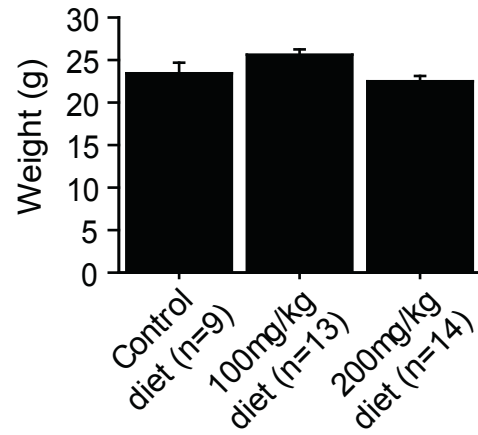

(C) Body weight of male N171-82Q mice treated with CDDO-TFEA diets

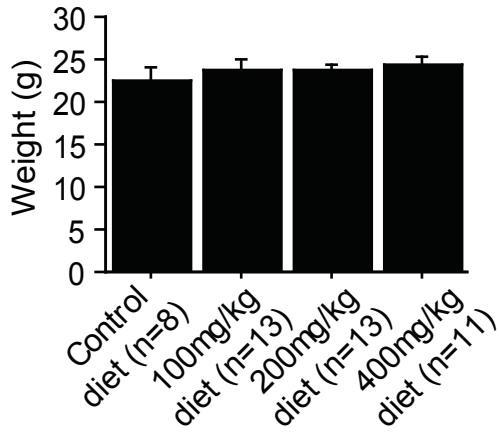

(D) Body weight of female N171-82Q mice treated with CDDO-TFEA diets

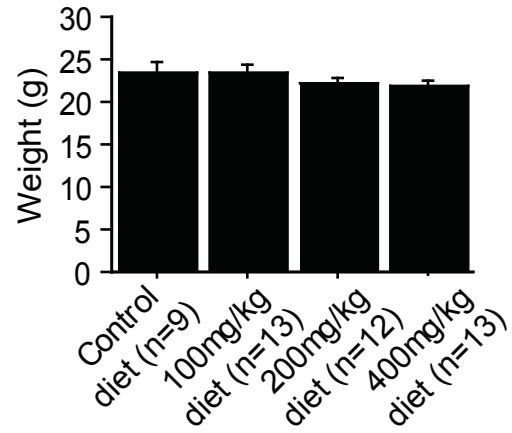

Supplement: NIHMS190980-supplement-07.pdf [file NIHMS190980-supplement-07.pdf]
